# Supplementary material for: Effects of salt stress on seed germination and respiratory metabolism in different Flueggea suffruticosa genotypes
Source: PeerJ journal article supplement (doi:10.7717/peerj.15668), 2023-07-19
Supplement: Data_S1.xlsx [file Data_S1.xlsx]

## Sheet: germination rate
	P2							P27
	1 DAT							1 DAT
	Treatment	1	2	3	AVE	SD		Treatment	1	2	3	AVE	SD
	CK	0	0	0	0	0		CK	0	0	0	0	0
	S40	0	0	0	0	0		S40	0	0	0	0	0
	S80	0	0	0	0	0		S80	0	0	0	0	0
	S120	0	0	0	0	0		S120	0	0	0	0	0
	S160	0	0	0	0	0		S160	0	0	0	0	0
	S200	0	0	0	0	0		S200	0	0	0	0	0
	S240	0	0	0	0	0		S240	0	0	0	0	0
	2 DAT							2 DAT
	Treatment	1	2	3	AVE	SD		Treatment	1	2	3	AVE	SD
	CK	0	0	0	0	0		CK	0	0	0	0	0
	S40	0	0	0	0	0		S40	0	0	0	0	0
	S80	0	0	0	0	0		S80	0	0	0	0	0
	S120	0	0	0	0	0		S120	0	0	0	0	0
	S160	0	0	0	0	0		S160	0	0	0	0	0
	S200	0	0	0	0	0		S200	0	0	0	0	0
	S240	0	0	0	0	0		S240	0	0	0	0	0
	3 DAT							3 DAT
	Treatment	1	2	3	AVE	SD		Treatment	1	2	3	AVE	SD
	CK	0	0	0	0	0		CK	0	0	0	0	0
	S40	0	0	0	0	0		S40	0	0	0	0	0
	S80	0	0	0	0	0		S80	0	0	0	0	0
	S120	0	0	0	0	0		S120	0	0	0	0	0
	S160	0	0	0	0	0		S160	0	0	0	0	0
	S200	0	0	0	0	0		S200	0	0	0	0	0
	S240	0	0	0	0	0		S240	0	0	0	0	0
	4 DAT							4 DAT
	Treatment	1	2	3	AVE	SD		Treatment	1	2	3	AVE	SD
	CK	3.33333	0	0	1.11111	1.57135		CK	0	16.6667	10	8.88889	6.84935
	S40	0	0	0	0	0		S40	3.33333	10	3.33333	5.55556	3.1427
	S80	0	0	0	0	0		S80	3.33333	6.66667	0	3.33333	2.72166
	S120	0	0	0	0	0		S120	0	0	0	0	0
	S160	0	0	0	0	0		S160	0	0	0	0	0
	S200	0	0	0	0	0		S200	0	0	0	0	0
	S240	0	0	0	0	0		S240	0	0	0	0	0
	5 DAT							5 DAT
	Treatment	1	2	3	AVE	SD		Treatment	1	2	3	AVE	SD
	CK	40	43.3333	43.3333	42.2222	1.57135		CK	46.6667	50	43.3333	46.6667	2.72166
	S40	16.6667	23.3333	16.6667	18.8889	3.1427		S40	36.6667	46.6667	30	37.7778	6.84935
	S80	0	0	6.66667	2.22222	3.1427		S80	13.3333	23.3333	23.3333	20	4.71405
	S120	0	0	3.33333	1.11111	1.57135		S120	0	0	6.66667	2.22222	3.1427
	S160	0	0	0	0	0		S160	0	0	0	0	0
	S200	0	0	0	0	0		S200	0	0	0	0	0
	S240	0	0	0	0	0		S240	0	0	0	0	0
	6 DAT							6 DAT
	Treatment	1	2	3	AVE	SD		Treatment	1	2	3	AVE	SD
	CK	66.6667	60	70	65.5556	4.1574		CK	73.3333	63.3333	70	68.8889	4.1574
	S40	50	56.6667	36.6667	47.7778	8.31479		S40	43.3333	63.3333	73.3333	60	12.4722
	S80	3.33333	3.33333	20	8.88889	7.85674		S80	20	50	40	36.6667	12.4722
	S120	3.33333	3.33333	3.33333	3.33333	0		S120	0	3.33333	13.3333	5.55556	5.66558
	S160	0	0	0	0	0		S160	0	0	0	0	0
	S200	0	0	0	0	0		S200	0	0	0	0	0
	S240	0	0	0	0	0		S240	0	0	0	0	0
	7 DAT							7 DAT
	Treatment	1	2	3	AVE	SD		Treatment	1	2	3	AVE	SD
	CK	80	73.3333	76.6667	76.6667	2.72166		CK	86.6667	73.3333	90	83.3333	7.20082
	S40	63.3333	76.6667	56.6667	65.5556	8.31479		S40	63.3333	76.6667	83.3333	74.4444	8.31479
	S80	13.3333	23.3333	36.6667	24.4444	9.55814		S80	36.6667	60	56.6667	51.1111	10.304
	S120	6.66667	10	6.66667	7.77778	1.57135		S120	13.3333	6.66667	20	13.3333	5.44331
	S160	0	0	0	0	0		S160	0	0	0	0	0
	S200	0	0	0	0	0		S200	0	0	0	0	0
	S240	0	0	0	0	0		S240	0	0	0	0	0
	8 DAT							8 DAT
	Treatment	1	2	3	AVE	SD		Treatment	1	2	3	AVE	SD
	CK	80	80	80	80	0		CK	86.6667	73.3333	96.6667	85.5556	9.55814
	S40	70	80	66.6667	72.2222	5.66558		S40	73.3333	86.6667	90	83.3333	7.20082
	S80	50	53.3333	56.6667	53.3333	2.72166		S80	60	80	80	73.3333	9.42809
	S120	30	26.6667	20	25.5556	4.1574		S120	33.3333	30	46.6667	36.6667	7.20082
	S160	0	6.66667	6.66667	4.44444	3.1427		S160	0	6.66667	6.66667	4.44444	3.1427
	S200	0	0	0	0	0		S200	0	0	0	0	0
	S240	0	0	0	0	0		S240	0	0	0	0	0
	9 DAT							9 DAT
	Treatment	1	2	3	AVE	SD		Treatment	1	2	3	AVE	SD
	CK	83.3333	83.3333	83.3333	83.3333	0		CK	86.6667	73.3333	96.6667	85.5556	9.55814
	S40	73.3333	83.3333	66.6667	74.4444	6.84935		S40	76.6667	90	90	85.5556	6.28539
	S80	50	60	60	56.6667	4.71405		S80	63.3333	83.3333	80	75.5556	8.7489
	S120	33.3333	36.6667	36.6667	35.5556	1.57135		S120	43.3333	63.3333	60	55.5556	8.7489
	S160	3.33333	20	10	11.1111	6.84935		S160	30	30	26.6667	28.8889	1.57135
	S200	0	0	0	0	0		S200	3.33333	6.66667	6.66667	5.55556	1.57135
	S240	0	0	0	0	0		S240	0	0	0	0	0
	10 DAT							10 DAT
	Treatment	1	2	3	AVE	SD		Treatment	1	2	3	AVE	SD
	CK	83.3333	83.3333	83.3333	83.3333	0		CK	86.6667	73.3333	96.6667	85.5556	9.55814
	S40	73.3333	90	66.6667	76.6667	9.81307		S40	76.6667	90	90	85.5556	6.28539
	S80	56.6667	63.3333	60	60	2.72166		S80	70	86.6667	80	78.8889	6.84935
	S120	36.6667	36.6667	36.6667	36.6667	0		S120	50	63.3333	60	57.7778	5.66558
	S160	13.3333	26.6667	16.6667	18.8889	5.66558		S160	46.6667	53.3333	46.6667	48.8889	3.1427
	S200	3.33333	0	0	1.11111	1.57135		S200	6.66667	10	6.66667	7.77778	1.57135
	S240	0	0	3.33333	1.11111	1.57135		S240	0	0	3.33333	1.11111	1.57135
	11 DAT							11 DAT
	Treatment	1	2	3	AVE	SD		Treatment	1	2	3	AVE	SD
	CK	83.3333	83.3333	86.6667	84.4444	1.57135		CK	86.6667	73.3333	96.6667	85.5556	9.55814
	S40	73.3333	90	66.6667	76.6667	9.81307		S40	76.6667	90	90	85.5556	6.28539
	S80	56.6667	63.3333	60	60	2.72166		S80	70	86.6667	80	78.8889	6.84935
	S120	36.6667	36.6667	36.6667	36.6667	0		S120	56.6667	63.3333	63.3333	61.1111	3.1427
	S160	16.6667	36.6667	30	27.7778	8.31479		S160	53.3333	56.6667	53.3333	54.4444	1.57135
	S200	3.33333	6.66667	0	3.33333	2.72166		S200	6.66667	10	13.3333	10	2.72166
	S240	0	0	3.33333	1.11111	1.57135		S240	0	3.33333	3.33333	2.22222	1.57135
	12 DAT							12 DAT
	Treatment	1	2	3	AVE	SD		Treatment	1	2	3	AVE	SD
	CK	83.3333	83.3333	86.6667	84.4444	1.57135		CK	86.6667	73.3333	96.6667	85.5556	9.55814
	S40	73.3333	90	66.6667	76.6667	9.81307		S40	76.6667	90	90	85.5556	6.28539
	S80	56.6667	63.3333	60	60	2.72166		S80	70	86.6667	80	78.8889	6.84935
	S120	36.6667	36.6667	36.6667	36.6667	0		S120	63.3333	63.3333	63.3333	63.3333	7.10543e-15
	S160	16.6667	40	33.3333	30	9.81307		S160	53.3333	56.6667	56.6667	55.5556	1.57135
	S200	3.33333	6.66667	0	3.33333	2.72166		S200	6.66667	10	13.3333	10	2.72166
	S240	0	0	3.33333	1.11111	1.57135		S240	3.33333	10	3.33333	5.55556	3.1427

## Sheet: soluble sugar
		P2
			Treatment	1	2	3	AVE	SD
		3 DAT	CK	0.88	0.71	0.87	0.82	0.0778888
			S40	0.86	0.92	0.74	0.84	0.0748331
			S80	0.9	0.96	1.02	0.96	0.0489898
			S120	0.94	1.07	0.99	1	0.0535413
			S160	0.88	1.21	0.85	0.98	0.163095
			S200	0.98	1.05	1.15	1.06	0.0697615
			S240	1	1.18	1.15	1.11	0.0787401
		5 DAT	CK	1.43	1.22	1.43	1.36	0.0989949
			S40	1.71	1.62	1.56	1.63	0.0616441
			S80	1.92	1.69	1.64	1.75	0.121929
			S120	2.09	1.92	2.02	2.01	0.0697615
			S160	2.13	2.04	1.89	2.02	0.0989949
			S200	1.88	2.05	2.04	1.99	0.0778888
			S240	1.95	2.07	1.89	1.97	0.0748331
		7 DAT	CK	1.34	1.33	1.17	1.28	0.0778888
			S40	1.58	1.5	1.45	1.51	0.0535413
			S80	1.96	1.84	1.72	1.84	0.0979796
			S120	2	1.91	2.06	1.99	0.0616441
			S160	2.07	2.02	2.11	2.06667	0.0368179
			S200	2.15	1.76	2.12	2.01	0.1772
			S240	2.35	2.15	2.28	2.26	0.0828654
		9 DAT	CK	1.64	1.51	1.74	1.63	0.094163
			S40	1.91	1.86	2.11	1.96	0.108012
			S80	2.23	1.95	1.85	2.01	0.160831
			S120	1.94	2	2.03	1.99	0.0374166
			S160	2	1.97	2.11	2.02667	0.0601849
			S200	2.06	2.12	2.24	2.14	0.0748331
			S240	2.3	2.28	2.2	2.26	0.0432049
		11 DAT	CK	1.76	1.78	1.56	1.7	0.0993311
			S40	1.88	1.79	1.76	1.81	0.0509902
			S80	1.78	1.87	1.81	1.82	0.0374166
			S120	1.76	1.79	1.97	1.84	0.0927362
			S160	1.94	1.82	1.82	1.86	0.0565685
			S200	2.03	1.89	1.96	1.96	0.0571548
			S240	2.11	1.96	1.93	2	0.0787401
		P27
			Treatment	1	2	3	AVE	SD
		3 DAT	CK	0.88	0.96	1.07	0.97	0.0778888
			S40	1.15	1.04	1.02	1.07	0.0571548
			S80	1.19	1.1	0.98	1.09	0.0860233
			S120	1.39	1.21	1.12	1.24	0.11225
			S160	1.35	1.39	1.01	1.25	0.170489
			S200	1.51	1.48	1.36	1.45	0.0648074
			S240	1.44	1.64	1.48	1.52	0.0864099
		5 DAT	CK	1.86	1.69	1.61	1.72	0.104243
			S40	2.03	1.92	2.02	1.99	0.0496655
			S80	2.14	1.98	2	2.04	0.0711805
			S120	2.45	2.08	2.04	2.19	0.184572
			S160	2.51	2.77	2.58	2.62	0.109848
			S200	3.25	2.96	3.24	3.15	0.134412
			S240	3.13	2.92	3.1	3.05	0.0927362
		7 DAT	CK	1.78	1.97	1.68	1.81	0.120277
			S40	1.91	2.08	1.83	1.94	0.104243
			S80	2.34	2.07	2.43	2.28	0.152971
			S120	2.55	2.39	2.35	2.43	0.0864099
			S160	3.01	3.21	3.47	3.23	0.188326
			S200	3.03	3.35	3.25	3.21	0.133666
			S240	2.8	2.73	2.96	2.83	0.0962635
		9 DAT	CK	1.93	1.87	1.93	1.91	0.0282843
			S40	2.11	2.25	2.33	2.23	0.0909212
			S80	2.38	2.44	2.56	2.46	0.0748331
			S120	2.42	2.5	2.67	2.53	0.104243
			S160	2.66	2.74	2.55	2.65	0.0778888
			S200	2.57	2.74	2.7	2.67	0.0725718
			S240	2.8	2.79	2.6	2.73	0.0920145
		11 DAT	CK	1.79	1.73	1.91	1.81	0.0748331
			S40	1.92	2.01	1.8	1.91	0.0860233
			S80	2.33	1.95	2.02	2.1	0.165126
			S120	2.39	2.27	2.54	2.4	0.110454
			S160	3.15	2.97	2.85	2.99	0.123288
			S200	3.27	3.14	3.7	3.37	0.239305
			S240	3.01	3.15	3.35	3.17	0.139523
		Explanation：This table is the raw data of soluble sugar conent determination. We set up three repetitions in each experiment to ensure the reliability of the results, and finally take the average as the final result.

## Sheet: hexokinase
		P2
			Treatment	1	2	3	AVE	SD
		3 DAT	CK	1218.49	1395.89	1425.81	1346.73	91.4984
			S40	1300.59	1549.15	1374.1	1407.95	104.258
			S80	1418.16	1578.77	1491.99	1496.31	65.6398
			S120	1657.45	1497.25	1385.83	1513.51	111.483
			S160	1728.16	1677	1887.16	1764.11	89.4834
			S200	1133.66	1587.28	1552.47	1424.47	206.124
			S240	1298.36	1534.57	1343.37	1392.1	102.404
		5 DAT	CK	803.18	996.17	1038.8	946.05	102.512
			S40	1236.49	1587.22	1469.97	1431.23	145.782
			S80	1801.04	1515.63	1641.75	1652.81	116.78
			S120	2059.94	2306.18	2078.15	2148.09	112.033
			S160	2207.19	2559.64	2261.77	2342.87	154.893
			S200	983.21	1372.91	748.64	1034.92	257.467
			S240	1125.19	1019.3	760.44	968.31	153.211
		7 DAT	CK	997.26	918.14	1147.92	1021.11	95.3108
			S40	1321.23	1582.15	1554.19	1485.86	116.967
			S80	2123.18	1859.15	1777.45	1919.93	147.541
			S120	2172.29	1929.82	1924.79	2008.97	115.505
			S160	1889.51	1930.48	2139.11	1986.37	109.293
			S200	1772.94	1876.15	2430.44	2026.51	288.713
			S240	1800.16	1774.9	1986.93	1854	94.562
		9 DAT	CK	686.18	507.15	523.45	572.26	80.828
			S40	998.64	1107.35	861.13	989.04	100.748
			S80	1028.69	926.48	1128.31	1027.83	82.399
			S120	1089.92	1166.79	943.63	1066.78	92.5624
			S160	1209.95	1026.84	1297.45	1178.08	112.751
			S200	1328.14	1582.55	1508.39	1473.03	106.83
			S240	1792.29	1504.54	1538.6	1611.81	128.374
		11 DAT	CK	682.6	503.52	614.39	600.17	73.7973
			S40	876.23	851.49	806.35	844.69	28.9308
			S80	920.95	816.34	1029.49	922.26	87.0231
			S120	1186.31	980.21	1000.94	1055.82	92.6577
			S160	1206.92	1092.64	1269.6	1189.72	73.2602
			S200	1228.63	997.22	1275	1166.95	121.501
			S240	1323.01	1580.35	1297.15	1400.17	127.843
		P27
			Treatment	1	2	3	AVE	SD
		3 DAT	CK	1317.78	1056.52	1231.82	1202.04	108.718
			S40	2124.58	1782.44	1769.28	1892.1	164.476
			S80	2036.47	1963.1	2195.3	2064.96	96.9117
			S120	2195.49	2163.37	1818.29	2059.05	170.747
			S160	2148.36	2231.21	2415.3	2264.96	111.56
			S200	2316.49	2645.28	2550.98	2504.25	138.235
			S240	1856.24	2056.42	1930.59	1947.75	82.619
		5 DAT	CK	887.23	1088.21	912.8	962.747	89.328
			S40	1200.36	1404.27	1402.17	1335.6	95.633
			S80	1415.95	1490.33	1133.4	1346.56	153.755
			S120	1582.39	1650.32	1258.25	1496.99	171.075
			S160	2403.12	2759.98	2366.35	2509.82	177.528
			S200	3051.59	3365.01	2899.21	3105.27	193.913
			S240	1872.26	1709.9	1893.8	1825.32	82.0866
		7 DAT	CK	849.22	983.13	1005.8	946.05	69.0918
			S40	1305.49	1566.31	1585.77	1485.86	127.786
			S80	1819.16	1774.27	2166.35	1919.93	175.209
			S120	2131.12	1995.08	1900.7	2008.97	94.5797
			S160	2383.37	2174.16	2301.57	2286.37	86.0835
			S200	2698.09	2381.02	2500.42	2526.51	130.751
			S240	2197.21	2484.18	2380.6	2354	118.656
		9 DAT	CK	503.97	597.4	448.72	516.697	61.3618
			S40	1037.56	1300.1	1146.5	1161.39	107.697
			S80	1189.64	1294.03	1067.27	1183.65	92.6713
			S120	1090.58	1320.57	1356.82	1255.99	117.895
			S160	1428.49	1288.77	1499.95	1405.74	87.7023
			S200	2080.99	1856.33	2115.32	2017.55	114.856
			S240	1650.2	1443.33	1583.62	1559.05	86.2228
		11 DAT	CK	998.33	1127.78	944.01	1023.37	77.0854
			S40	1203.16	920.31	1110.26	1077.91	117.717
			S80	1289.39	1302.14	1178.48	1256.67	55.5332
			S120	1303.25	1389.16	1608.78	1433.73	128.652
			S160	1627.32	1513.88	1725.58	1622.26	86.5002
			S200	1622.58	1385.24	1526.08	1511.3	97.4556
			S240	1730.15	1455.45	1550.68	1578.76	113.89
		Explanation：This table is the raw data of hexokinase activity determination. We set up three repetitions in each experiment to ensure the reliability of the results, and finally take the average as the final result.

## Sheet: 6-phosphofructokinase
		P2
			Treatment	1	2	3	AVE	SD
		3 DAT	CK	265.12	289.36	316.27	290.25	20.8914
			S40	335.18	278.72	344.6	319.5	29.0911
			S80	338.54	350.17	312.54	333.75	15.7313
			S120	416.84	359.33	416.33	397.5	26.9911
			S160	353.01	334.88	415.36	367.75	34.4694
			S200	342.85	289.84	379.81	337.5	36.9244
			S240	361.42	335.28	336.05	344.25	12.1451
		5 DAT	CK	423.15	419.82	439.53	427.5	8.61444
			S40	401.84	455.26	463.65	440.25	27.3751
			S80	472.56	425.18	465.76	454.5	20.9174
			S120	499.45	450.54	481.01	477	20.1677
			S160	516.85	488.13	439.52	481.5	31.916
			S200	407.65	433.52	477.33	439.5	28.7593
			S240	349.21	381.1	234.94	321.75	62.7494
		7 DAT	CK	521.13	488.54	549.58	519.75	24.9386
			S40	618.89	675.46	683.4	659.25	28.7223
			S80	602.23	678.15	690.62	657	39.0614
			S120	773.19	693.85	716.96	728	33.3179
			S160	617.92	583.1	644.73	615.25	25.2311
			S200	589.74	603.18	636.33	609.75	19.5794
			S240	544.16	608.47	538.62	563.75	31.7026
		9 DAT	CK	503.15	486.54	547.06	512.25	25.5314
			S40	582.18	510.01	563.06	551.75	30.5294
			S80	601.25	655.12	590.88	615.75	28.1589
			S120	633.84	632.59	583.07	616.5	23.6441
			S160	593.19	554.28	618.78	588.75	26.5185
			S200	487.18	521.03	532.29	513.5	19.1704
			S240	463.32	488.74	532.94	495	28.7649
		11 DAT	CK	822.56	749.52	794.17	788.75	30.0637
			S40	847.21	795.63	817.91	820.25	21.1224
			S80	896.12	842.66	832.97	857.25	27.7685
			S120	869.44	870.15	892.91	877.5	10.9004
			S160	901.15	825.47	905.73	877.45	36.8029
			S200	832.99	823.06	789.7	815.25	18.5158
			S240	740.14	803.8	817.81	787.25	33.7993
		P27
			Treatment	1	2	3	AVE	SD
		3 DAT	CK	455.29	431.03	517.68	468	36.4985
			S40	625.07	602.16	534.52	587.25	38.4409
			S80	575.74	576.66	637.1	596.5	28.711
			S120	533.45	523.5	495.55	517.5	16.0437
			S160	528.19	472.6	476.71	492.5	25.2924
			S200	461.13	505.05	454.32	473.5	22.4818
			S240	470.84	422.11	480.3	457.75	25.4955
		5 DAT	CK	244.56	255.21	307.98	269.25	27.7292
			S40	432.08	486.13	380.04	432.75	43.3137
			S80	445.19	497.26	471.3	471.25	21.2575
			S120	321.55	333.01	363.94	339.5	17.9038
			S160	378.23	334.4	316.37	343	25.9761
			S200	313.09	279.98	304.68	299.25	14.0518
			S240	288.1	275.14	318.01	293.75	17.9518
		7 DAT	CK	588.25	538.14	528.11	551.5	26.3068
			S40	652.92	694.3	610.28	652.5	34.3023
			S80	895.25	814.1	862.4	857.25	33.3289
			S120	797.84	759.16	825.75	794.25	27.3035
			S160	776.03	794.22	815.5	795.25	16.13
			S200	782.1	722.48	729.67	744.75	26.5731
			S240	679.12	671.55	735.08	695.25	28.3331
		9 DAT	CK	678.2	689.98	650.07	672.75	16.7427
			S40	882.97	829.88	842.4	851.75	22.6599
			S80	959.95	931.2	919.1	936.75	17.1325
			S120	925.87	966.77	901.86	931.5	26.7968
			S160	973.12	984.35	1005.03	987.5	13.2163
			S200	984.13	963.3	1049.57	999	36.7556
			S240	918.56	930.4	884.04	911	19.6669
		11 DAT	CK	864.23	861.5	930.77	885.5	32.0301
			S40	981.27	953.12	992.11	975.5	16.4322
			S80	990.3	987.76	937.94	972	24.1064
			S120	1015.97	983.14	986.64	995.25	14.7208
			S160	1055.32	996.67	1026.01	1026	23.9438
			S200	912.36	960.8	976.84	950	27.4092
			S240	986.16	928.42	912.92	942.5	31.5141
		Explanation：This table is the raw data of 6-phosphofructokinase activity determination. We set up three repetitions in each experiment to ensure the reliability of the results, and finally take the average as the final result.

## Sheet: pyruvate kinase
		P2
			Treatment	1	2	3	AVE	SD
		3 DAT	CK	279.55	354.88	435.91	356.78	63.8478
			S40	577.61	620.22	502.6	566.81	48.6216
			S80	679.64	703.46	522.41	635.17	80.3242
			S120	859.49	751.51	793.26	801.42	44.4587
			S160	703.16	797.64	772.51	757.77	39.9547
			S200	794.52	694.55	705.85	731.64	44.7016
			S240	645.31	687.16	548.89	627.12	57.8953
		5 DAT	CK	419.54	579.16	467.85	488.85	66.8351
			S40	513.15	567.13	446.84	509.04	49.1941
			S80	624.59	689.13	554.08	622.6	55.1519
			S120	644.97	736.46	537.64	639.69	81.2537
			S160	689.44	697.17	570.17	652.26	58.1321
			S200	543.58	497.18	500.82	513.86	21.0677
			S240	501.77	549.43	433.56	494.92	47.5511
		7 DAT	CK	679.59	544.29	630.36	618.08	55.9143
			S40	623.26	711.49	725.86	686.87	45.36
			S80	703.49	700.44	788.02	730.65	40.5858
			S120	1025.48	974.11	825.42	941.67	84.8342
			S160	932.18	1038.19	1086.84	1019.07	64.5709
			S200	928.91	786.47	857.93	857.77	58.151
			S240	888.19	846.21	947.39	893.93	41.5055
		9 DAT	CK	911.38	847.62	722.36	827.12	78.5168
			S40	1027.49	901.03	831.66	920.06	81.0718
			S80	996.13	1123.46	1129.14	1082.91	61.4065
			S120	1272.45	1104.16	1015.34	1130.65	106.623
			S160	1417.4	1689.11	1618.07	1574.86	115.056
			S200	1752.13	1596.16	1590.28	1646.19	74.9493
			S240	1140.21	1347.49	1374.59	1287.43	104.687
		11 DAT	CK	1744.23	1806.12	1623.39	1724.58	75.8822
			S40	1813.57	2005.49	1975.95	1931.67	84.3756
			S80	2018.13	1987.27	1855.46	1953.62	70.5437
			S120	2223.23	1944.15	1859.74	2009.04	155.326
			S160	1988.34	1935.25	1800.56	1908.05	79.0368
			S200	1829.11	1726.25	1758.63	1771.33	42.9419
			S240	1748.26	1763.26	1709.68	1740.4	22.569
		P27
			Treatment	1	2	3	AVE	SD
		3 DAT	CK	493.16	401.18	411.17	435.17	41.2074
			S40	754.58	597.13	553.8	635.17	86.2687
			S80	846.55	784.23	928.97	853.25	59.2795
			S120	1191.43	987.16	929.89	1036.16	112.254
			S160	1432.21	1674.28	1459.63	1522.04	108.23
			S200	1366.49	1320.41	1519.04	1401.98	84.8847
			S240	1621.56	1349.17	1224.62	1398.45	165.754
		5 DAT	CK	737.65	688.17	550.46	658.76	79.1991
			S40	753.18	1011.07	819.65	861.3	109.325
			S80	993.84	893.18	843.07	910.03	62.6942
			S120	1213.49	931.55	1133.78	1092.94	118.669
			S160	1807.19	1599.48	1589.11	1665.26	100.449
			S200	1446.22	1644.82	1434.4	1508.48	96.5276
			S240	807.15	674.33	751.15	744.21	54.4451
		7 DAT	CK	866.1	897.41	744.97	836.16	65.7358
			S40	1046.22	1149.37	908.24	1034.61	98.7826
			S80	1196.59	1241.47	1032.28	1156.78	89.9212
			S120	1602	1330.19	1379.26	1437.15	118.275
			S160	1897.11	1644.76	1788.65	1776.84	103.359
			S200	2187.2	1923.13	2043.09	2051.14	107.956
			S240	897.22	821.13	971.06	896.47	61.211
		9 DAT	CK	522.16	589.36	623.65	578.39	42.153
			S40	699.25	801.46	810.31	770.34	50.3979
			S80	1333.29	1352.1	1155.72	1280.37	88.4747
			S120	1296.87	1489.45	1181.48	1322.6	127.038
			S160	1889.54	1688.43	1966.54	1848.17	117.246
			S200	1544.41	1487.12	1703.64	1578.39	91.6013
			S240	1284.55	1281.11	1118.67	1228.11	77.3985
		11 DAT	CK	698.55	643.32	853.05	731.64	88.7614
			S40	1363.23	1102.84	1234.79	1233.62	106.307
			S80	1877.59	2093.26	1830.01	1933.62	114.542
			S120	2593.15	2080.12	2517.43	2396.9	226.12
			S160	1865.24	1889.99	1668.92	1808.05	98.8973
			S200	1764.8	1601.52	1729.03	1698.45	70.0783
			S240	1315.21	1450.27	1229.53	1331.67	90.8652
		Explanation：This table is the raw data of pyruvate kinase activity determination. We set up three repetitions in each experiment to ensure the reliability of the results, and finally take the average as the final result.

## Sheet: pyruvate dehydrogenase
		P2
			Treatment	1	2	3	AVE	SD
		3 DAT	CK	114.89	90.11	99.28	101.427	10.2296
			S40	138.79	157.34	169.91	155.347	12.7826
			S80	159.24	158.21	176.01	164.487	8.15907
			S120	168.49	177.88	149.67	165.347	11.7292
			S160	177.72	169.64	200.93	182.763	13.2625
			S200	119.11	133.07	146.11	132.763	11.0248
			S240	103.13	99.46	71.55	91.38	14.1017
		5 DAT	CK	101.79	128.43	110.06	113.427	11.1332
			S40	182.51	144.23	160.3	162.347	15.6946
			S80	152.77	167.42	158.27	159.487	6.0424
			S120	164.43	196.58	191.42	184.143	14.0977
			S160	172.27	162.56	190.18	175.003	11.4403
			S200	153.77	139.86	134.66	142.763	8.06722
			S240	133.3	151.26	139.58	141.38	7.44179
		7 DAT	CK	155.59	163.08	149.81	156.16	5.43243
			S40	187.26	197.63	177.35	187.413	8.27999
			S80	206.07	179.45	185.92	190.48	11.3358
			S120	196.33	207.14	205.99	203.153	4.84761
			S160	203.16	216.12	191.16	203.48	10.1924
			S200	186.59	191.43	144.41	174.143	21.1173
			S240	179.32	181.56	171.52	177.467	4.30322
		9 DAT	CK	192.73	177.59	188.16	186.16	6.3406
			S40	211.18	190.65	226.41	209.413	14.6523
			S80	230.61	267.18	232.65	243.48	16.7791
			S120	204.05	189.26	180.15	191.153	9.84855
			S160	209.47	198.1	178.87	195.48	12.629
			S200	187.22	178.26	171.95	179.143	6.26516
			S240	163.08	174.12	180.2	172.467	7.08631
		11 DAT	CK	204.89	181.58	202.01	196.16	10.3764
			S40	207.08	194.21	202.95	201.413	5.36534
			S80	211.59	208.76	190.09	203.48	9.53839
			S120	209.52	187.55	176.39	191.153	13.7632
			S160	139.76	151.43	145.25	145.48	4.76703
			S200	110.25	134.48	146.05	130.26	14.9168
			S240	124.52	130.77	154.11	136.467	12.734
		P27
			Treatment	1	2	3	AVE	SD
		3 DAT	CK	87.42	104.13	102.97	98.1733	7.61849
			S40	243.18	277.49	274.34	265.003	15.4849
			S80	354.15	367.46	402.38	374.663	20.338
			S120	233.12	199.59	223.68	218.797	14.1174
			S160	196.26	187.11	245.6	209.657	25.6888
			S200	138.42	105.7	114.85	119.657	13.7835
			S240	99.45	106.77	122.75	109.657	9.72872
		5 DAT	CK	172.13	144.75	136.64	151.173	15.184
			S40	218.16	258.72	258.13	245.003	18.9826
			S80	290.15	275.55	258.29	274.663	13.0219
			S120	261.21	247.43	234.75	247.797	10.8054
			S160	228.45	248.76	241.76	239.657	8.42386
			S200	220.19	234.25	204.53	219.657	12.139
			S240	197.45	224.56	206.96	209.657	11.2307
		7 DAT	CK	74.77	94.99	88.72	86.16	8.45093
			S40	148.71	114.45	119.08	127.413	15.1772
			S80	154.52	184.89	160.03	166.48	13.2108
			S120	237.48	217.4	214.58	223.153	10.1957
			S160	244.75	210.24	215.45	223.48	15.1898
			S200	241.24	257.42	263.77	254.143	9.48517
			S240	214.58	233.56	204.26	217.467	12.1346
		9 DAT	CK	107.19	134.79	136.5	126.16	13.432
			S40	234.16	258.79	240.29	244.413	10.4693
			S80	327.45	376.12	326.87	343.48	23.0812
			S120	288.45	321.45	275.56	295.153	19.3248
			S160	292.34	278.49	303.61	291.48	10.2732
			S200	289.41	331.02	307	309.143	17.0547
			S240	277.85	303.31	278.24	286.467	11.9111
		11 DAT	CK	222.72	200.7	228.96	217.46	12.1218
			S40	254.55	222.23	212.15	229.643	18.0861
			S80	366.22	335.46	433.12	378.267	40.7694
			S120	341.81	353.38	370.22	355.137	11.6647
			S160	528.59	488.84	456.28	491.237	29.569
			S200	551.52	582.56	525.26	553.113	23.4197
			S240	473.34	427.37	434.79	445.167	20.1505
		Explanation：This table is the raw data of pyruvate dehydrogenase activity determination. We set up three repetitions in each experiment to ensure the reliability of the results, and finally take the average as the final result.

## Sheet: citrate synthase
		P2
			Treatment	1	2	3	AVE	SD
		3 DAT	CK	114.87	112.62	127.58	118.357	6.58625
			S40	119.18	108.92	120.2	116.1	5.09407
			S80	128.39	121.03	115.35	121.59	5.33826
			S120	136.4	133.56	118.19	129.383	7.99935
			S160	129.28	127.56	114.14	123.66	6.76818
			S200	98.13	112.54	103.91	104.86	5.92109
			S240	107.62	112.2	83.99	101.27	12.361
		5 DAT	CK	87.15	115.78	113.54	105.49	13.0005
			S40	128.16	130.22	119.2	125.86	4.78383
			S80	165.2	149.56	174.23	162.997	10.1913
			S120	207.18	188.89	193.41	196.493	7.77866
			S160	108.46	141.9	138.67	129.677	15.0603
			S200	136.03	115.64	130.47	127.38	8.60616
			S240	98.16	108.4	79.82	95.46	11.8229
		7 DAT	CK	188.26	196.23	201.98	195.49	5.62555
			S40	216.34	204.01	197.23	205.86	7.91054
			S80	207.19	209.33	192.47	202.997	7.49457
			S120	185.59	179.06	164.83	176.493	8.66738
			S160	132.67	107.33	107.03	115.677	12.0167
			S200	109.45	115.82	96.87	107.38	7.87355
			S240	76.43	102.04	89.91	89.46	10.4601
		9 DAT	CK	196.57	193.41	175.09	188.357	9.46924
			S40	188.9	176.13	193.27	186.1	7.27209
			S80	181.04	169.62	194.11	181.59	10.0056
			S120	148.43	160.6	142.12	150.383	7.66982
			S160	168.8	143.12	149.06	153.66	10.9768
			S200	123.99	102.42	120.96	115.79	9.5346
			S240	89.15	106.77	88.66	94.86	8.42402
		11 DAT	CK	133.02	108.17	113.88	118.357	10.6274
			S40	108.03	119.75	90.52	106.1	12.0109
			S80	109.43	121.07	101.27	110.59	8.12483
			S120	115.46	101.8	98.89	105.383	7.22364
			S160	100.16	109.77	101.05	103.66	4.33567
			S200	109.84	105.53	90	101.79	8.52045
			S240	109.22	84.25	91.11	94.86	10.5332
		P27
			Treatment	1	2	3	AVE	SD
		3 DAT	CK	103.49	114.82	115.19	111.167	5.43032
			S40	116.85	121.46	99.57	112.627	9.42233
			S80	129.7	138.73	125.07	131.167	5.67229
			S120	166.64	155.1	142.6	154.78	9.8169
			S160	151.05	156.37	142.12	149.847	5.87943
			S200	132.88	143.37	146.38	140.877	5.78648
			S240	109.2	118.08	117.36	114.88	4.02711
		5 DAT	CK	97.15	110.3	96.05	101.167	6.47384
			S40	98.16	114.22	95.5	102.627	8.26934
			S80	163.7	144.84	144.96	151.167	8.86254
			S120	192.43	165.76	166.15	174.78	12.4815
			S160	166.22	148.5	164.82	159.847	8.04364
			S200	103.27	134.06	125.3	120.877	12.9533
			S240	136.89	147.02	150.73	144.88	5.84928
		7 DAT	CK	133.64	132.75	131.49	132.627	0.882056
			S40	174.17	175.42	163.91	171.167	5.15655
			S80	207.89	201.33	194.28	201.167	5.55746
			S120	188.04	199.47	196.83	194.78	4.88625
			S160	153.48	162.7	175.36	163.847	8.9692
			S200	148.23	165.05	136.35	149.877	11.7744
			S240	151.36	160.54	152.74	154.88	4.04168
		9 DAT	CK	82.73	104.04	102.46	96.41	9.6947
			S40	125.86	113.37	128.09	122.44	6.47775
			S80	143.09	159.07	139.08	147.08	8.63482
			S120	158.46	141.17	154.59	151.407	7.40883
			S160	153.55	154.43	121.73	143.237	15.2118
			S200	147.36	160.3	159.99	155.883	6.02824
			S240	149.39	161.85	158.79	156.677	5.30173
		11 DAT	CK	95.76	113.45	109.09	106.1	7.52503
			S40	128.92	118.87	119.53	122.44	4.58997
			S80	127.18	134.36	149.7	137.08	9.39278
			S120	120.96	151.17	122.09	131.407	13.9824
			S160	146.39	133.78	149.54	143.237	6.80941
			S200	179.64	165.5	185.51	176.883	8.39839
			S240	187.39	173.26	196.38	185.677	9.51613
		Explanation：This table is the raw data of citrate synthase activity determination. We set up three repetitions in each experiment to ensure the reliability of the results, and finally take the average as the final result.

## Sheet: G6PDH
		P2
			Treatment	1	2	3	AVE	SD
		3 DAT	CK	4688.12	4465.08	4426.96	4526.72	115.183
			S40	4289.14	4208.97	4043.81	4180.64	102.139
			S80	3609.46	3909.75	4161.29	3893.5	225.576
			S120	3946.27	3569.21	3847.14	3787.54	159.599
			S160	3469.28	3839.87	3879.05	3729.4	184.627
			S200	3744.29	3403.46	3599.39	3582.38	139.662
			S240	3089.42	3303.1	3483.96	3292.16	161.256
		5 DAT	CK	3953.87	4102.1	4366.79	4140.92	170.794
			S40	3718.42	4013.37	4180.19	3970.66	190.921
			S80	4308.19	3818.32	4043.47	4056.66	200.206
			S120	3277.16	3052.08	2987.23	3105.49	124.243
			S160	2809.44	3159.15	2750.49	2906.36	180.362
			S200	1437.1	1549.47	1827.77	1604.78	164.216
			S240	709.98	891.09	790.89	797.32	74.0775
		7 DAT	CK	3772.19	3528.45	3665.32	3655.32	99.7574
			S40	3631.44	3428.37	3733.35	3597.72	126.77
			S80	2978.32	3196.15	2689.69	2954.72	207.434
			S120	2918.16	3002.4	3255.66	3058.74	143.428
			S160	3102.48	2990.16	2853.9	2982.18	101.639
			S200	2963.02	2814.58	3095.8	2957.8	114.867
			S240	2462.13	2348.05	1950.56	2253.58	219.271
		9 DAT	CK	2345.19	2638.8	2654.85	2546.28	142.343
			S40	2084.64	2448.95	2325.01	2286.2	151.24
			S80	2378.49	2424.82	2227.49	2343.6	84.2527
			S120	2230.58	2411.84	2147.66	2263.36	110.314
			S160	1986.19	2244.15	2293.61	2174.65	134.782
			S200	1729.58	1940.24	2005.46	1891.76	117.729
			S240	1376.3	1597.42	1472.67	1482.13	90.5194
		11 DAT	CK	2303.75	2444.12	2525.27	2424.38	91.506
			S40	2309.44	2329.5	2518.46	2385.8	94.1616
			S80	2074.16	2314.89	2498.29	2295.78	173.677
			S120	2010.18	2283.47	2359.39	2217.68	149.963
			S160	1866.45	2093.87	2251.06	2070.46	157.887
			S200	2005.71	2047.15	2193.08	2081.98	80.3605
			S240	1326.88	1128.4	1479.88	1311.72	143.891
		P27
			Treatment	1	2	3	AVE	SD
		3 DAT	CK	2291.87	2356.45	2488.98	2379.1	82.0482
			S40	2558.1	2783.24	2518.12	2619.82	116.702
			S80	2355.42	2789.7	2763.78	2636.3	198.894
			S120	3202.65	3289.54	3577.19	3356.46	160.06
			S160	4176.85	4531.8	4485.71	4398.12	157.589
			S200	2983.15	3243.18	2878.55	3034.96	153.301
			S240	2108.49	2543.08	2022.77	2224.78	227.776
		5 DAT	CK	2620.18	2877.23	2720.13	2739.18	105.801
			S40	2933.75	3143.85	3327.88	3135.16	161.02
			S80	2768.49	2973.6	3104.16	2948.75	138.159
			S120	2382.08	2514.76	2993.58	2630.14	262.637
			S160	2725.08	2583.15	2896.74	2734.99	128.214
			S200	2523.49	2778.2	2532.57	2611.42	117.99
			S240	2689.48	2395.45	2506.09	2530.34	121.256
		7 DAT	CK	1639.46	1867.82	1606.58	1704.62	116.178
			S40	1580.8	1775.12	1912.26	1756.06	135.987
			S80	1508.99	1846.97	1960.04	1772	191.619
			S120	2695.18	2549.25	2232.05	2492.16	193.334
			S160	3628.49	3783.1	3334.95	3582.18	185.864
			S200	2865.15	2631.04	2511.17	2669.12	146.999
			S240	2733.87	2351.28	2391.33	2492.16	171.695
		9 DAT	CK	1433.01	1506.84	1762.29	1567.38	141.08
			S40	1978.28	2001.96	2434.09	2138.11	209.513
			S80	4606.52	4280.87	4654.19	4513.86	165.894
			S120	3929.5	4122.16	3745.78	3932.48	153.671
			S160	3600.83	3374.64	3634.03	3536.5	115.252
			S200	3208.61	3355.95	3668.38	3410.98	191.691
			S240	3198.55	3344.26	3526.57	3356.46	134.191
		11 DAT	CK	784.23	972.03	828.6	861.62	80.1455
			S40	985.54	1109.48	1222.86	1105.96	96.9175
			S80	1065.45	1219.3	1341.77	1208.84	113.049
			S120	1656.94	1392.07	1657.75	1568.92	125.052
			S160	1768.75	1322.63	1692.54	1594.64	194.84
			S200	1169.46	1406.33	1547.65	1374.48	156.029
			S240	1303.86	1477.41	1130.37	1303.88	141.678
		Explanation：This table is the raw data of glucose-6-phosphate dehydrogenase activity determination. We set up three repetitions in each experiment to ensure the reliability of the results, and finally take the average as the final result.

## Sheet: pyruvic acid
		P2
			Treatment	1	2	3	AVE	SD
		3 DAT	CK	149.15	159.23	158.51	155.63	4.59147
			S40	192.57	178.59	180.58	183.913	6.17486
			S80	189.28	171.23	174.95	178.487	7.78167
			S120	178.14	162.86	161.03	167.343	7.67086
			S160	151.65	164.52	179.86	165.343	11.5314
			S200	168.11	155.52	154.4	159.343	6.21581
			S240	163.48	157.14	153.98	158.2	3.95012
		5 DAT	CK	141.28	149.46	153	147.913	4.90807
			S40	157.22	151.78	142.46	150.487	6.09475
			S80	155.65	143.56	158.25	152.487	6.40073
			S120	149.26	161.77	167.86	159.63	7.74273
			S160	163.72	172.26	147.19	161.057	10.4066
			S200	159.54	161.14	134.21	151.63	12.3351
			S240	154.26	161.17	146.32	153.917	6.06735
		7 DAT	CK	128.15	121.49	123.82	124.487	2.7595
			S40	128.48	129.15	117.54	125.057	5.32212
			S80	119.15	129.14	129.45	125.913	4.78407
			S120	131.92	122.74	130.8	128.487	4.08915
			S160	147.42	132.68	149.93	143.343	7.60943
			S200	140.64	131.21	147.04	139.63	6.50191
			S240	134	133.2	142.69	136.63	4.2975
		9 DAT	CK	118.46	99.77	106.37	108.2	7.73911
			S40	121.54	101.01	120.91	114.487	9.53291
			S80	125.67	128.13	116.23	123.343	5.12917
			S120	131.49	129.54	121	127.343	4.55551
			S160	138.12	139.2	126.14	134.487	5.91843
			S200	131.15	139.78	137.67	136.2	3.67332
			S240	141.82	137.43	136.21	138.487	2.40907
		11 DAT	CK	108.27	102.51	103.53	104.77	2.50966
			S40	111.95	112.03	125.48	116.487	6.35933
			S80	113.77	109.29	124.68	115.913	6.46315
			S120	122.23	129.46	104.62	118.77	10.4318
			S160	134.28	130.07	121.11	128.487	5.49196
			S200	138.45	137.72	127.29	134.487	5.09753
			S240	129.69	139.11	140.66	136.487	4.84745
		P27
			Treatment	1	2	3	AVE	SD
		3 DAT	CK	129.28	125.11	113.07	122.487	6.87277
			S40	183.44	173.79	170.51	175.913	5.48803
			S80	185.13	177.46	170.3	177.63	6.05552
			S120	163.48	161.22	184.19	169.63	10.3367
			S160	166.24	169.79	153.75	163.26	6.87899
			S200	173.84	158.61	152.44	161.63	8.99371
			S240	156.53	154.88	172.62	161.343	8.00221
		5 DAT	CK	155.36	148.28	149.53	151.057	3.08541
			S40	176.47	168.23	165.9	170.2	4.53445
			S80	183.38	169.33	171.6	174.77	6.15832
			S120	160.18	151.22	166.63	159.343	6.31886
			S160	148.34	151.13	175.99	158.487	12.429
			S200	155.25	159.64	140	151.63	8.41668
			S240	144.87	147.11	158.62	150.2	6.02366
		7 DAT	CK	120.23	131.52	125.99	125.913	4.60944
			S40	136.58	139.75	123.7	133.343	6.94059
			S80	148.24	139.94	151.28	146.487	4.79267
			S120	165.12	181.23	165.96	170.77	7.40428
			S160	174.22	164.48	175.05	171.25	4.79909
			S200	169.85	176.44	180.6	175.63	4.42589
			S240	133.24	162.12	162.95	152.77	13.814
		9 DAT	CK	101.18	114.52	108.04	107.913	5.44677
			S40	125.34	121.37	131.03	125.913	3.96446
			S80	127.23	121.24	141.27	129.913	8.39446
			S120	132.76	126.88	141.25	133.63	5.89869
			S160	124.29	146.54	139.48	136.77	9.28345
			S200	149.44	117.01	139.58	135.343	13.5742
			S240	135.56	147.25	141.22	141.343	4.77322
		11 DAT	CK	122.88	116.34	112.81	117.343	4.17183
			S40	119.35	128.05	115.77	121.057	5.15649
			S80	122.23	121.22	135.15	126.2	6.34202
			S120	126.84	134.94	121.96	127.913	5.35314
			S160	134.56	121.96	139.22	131.913	7.29066
			S200	129.09	131.61	146.19	135.63	7.53759
			S240	158.75	134.22	139.63	144.2	10.5228
		Explanation：This table is the raw data of pyruvic acid conent determination. We set up three repetitions in each experiment to ensure the reliability of the results, and finally take the average as the final result.

## Sheet: citric acid
		P2
			Treatment	1	2	3	AVE	SD
		3 DAT	CK	0.124	0.115	0.122	0.120333	0.00385861
			S40	0.115	0.109	0.135	0.119667	0.0111156
			S80	0.12	0.123	0.131	0.124667	0.0046428
			S120	0.122	0.139	0.133	0.131333	0.00703957
			S160	0.115	0.101	0.099	0.105	0.00711805
			S200	0.071	0.099	0.083	0.0843333	0.0114698
			S240	0.082	0.075	0.087	0.0813333	0.00492161
		5 DAT	CK	0.104	0.108	0.098	0.103333	0.00410961
			S40	0.11	0.119	0.127	0.118667	0.00694422
			S80	0.129	0.123	0.115	0.122333	0.00573488
			S120	0.13	0.138	0.138	0.135333	0.00377124
			S160	0.095	0.084	0.095	0.0913333	0.00518545
			S200	0.092	0.082	0.106	0.0933333	0.00984322
			S240	0.055	0.048	0.043	0.0486667	0.00492161
		7 DAT	CK	0.123	0.121	0.116	0.12	0.00294392
			S40	0.122	0.111	0.114	0.115667	0.0046428
			S80	0.109	0.115	0.117	0.113667	0.00339935
			S120	0.109	0.117	0.1	0.108667	0.00694422
			S160	0.09	0.104	0.08	0.0913333	0.00984322
			S200	0.102	0.095	0.092	0.0963333	0.00418994
			S240	0.093	0.082	0.097	0.0906667	0.0063421
		9 DAT	CK	0.106	0.096	0.101	0.101	0.00408248
			S40	0.098	0.08	0.084	0.0873333	0.00771722
			S80	0.09	0.075	0.08	0.0816667	0.0062361
			S120	0.089	0.068	0.079	0.0786667	0.00857645
			S160	0.082	0.08	0.07	0.0773333	0.00524934
			S200	0.08	0.072	0.08	0.0773333	0.00377124
			S240	0.073	0.068	0.08	0.0736667	0.00492161
		11 DAT	CK	0.095	0.08	0.095	0.09	0.00707107
			S40	0.078	0.076	0.085	0.0796667	0.00385861
			S80	0.074	0.071	0.082	0.0756667	0.0046428
			S120	0.079	0.068	0.066	0.071	0.00571548
			S160	0.063	0.071	0.078	0.0706667	0.00612826
			S200	0.066	0.071	0.076	0.071	0.00408248
			S240	0.072	0.075	0.064	0.0703333	0.0046428
		P27
			Treatment	1	2	3	AVE	SD
		3 DAT	CK	0.079	0.069	0.087	0.0783333	0.00736357
			S40	0.202	0.195	0.176	0.191	0.0109848
			S80	0.216	0.21	0.231	0.219	0.00883176
			S120	0.132	0.145	0.154	0.143667	0.00903081
			S160	0.131	0.131	0.107	0.123	0.0113137
			S200	0.121	0.145	0.122	0.129333	0.0110855
			S240	0.098	0.102	0.08	0.0933333	0.00956847
		5 DAT	CK	0.064	0.066	0.074	0.068	0.00432049
			S40	0.072	0.069	0.074	0.0716667	0.0020548
			S80	0.071	0.072	0.076	0.073	0.00216025
			S120	0.08	0.073	0.068	0.0736667	0.00492161
			S160	0.077	0.076	0.06	0.071	0.00778888
			S200	0.101	0.08	0.085	0.0886667	0.00895669
			S240	0.13	0.117	0.118	0.121667	0.00590668
		7 DAT	CK	0.074	0.071	0.086	0.077	0.00648074
			S40	0.09	0.08	0.088	0.086	0.00432049
			S80	0.081	0.092	0.094	0.089	0.00571548
			S120	0.09	0.096	0.094	0.0933333	0.00249444
			S160	0.071	0.09	0.098	0.0863333	0.0113235
			S200	0.105	0.094	0.085	0.0946667	0.00817856
			S240	0.108	0.092	0.08	0.0933333	0.0114698
		9 DAT	CK	0.07	0.08	0.084	0.078	0.00588784
			S40	0.079	0.075	0.089	0.081	0.00588784
			S80	0.083	0.091	0.075	0.083	0.00653197
			S120	0.073	0.081	0.09	0.0813333	0.00694422
			S160	0.081	0.092	0.079	0.084	0.00571548
			S200	0.077	0.095	0.079	0.0836667	0.00805536
			S240	0.089	0.078	0.087	0.0846667	0.00478423
		11 DAT	CK	0.068	0.064	0.056	0.0626667	0.00498888
			S40	0.072	0.065	0.055	0.064	0.00697615
			S80	0.061	0.069	0.078	0.0693333	0.00694422
			S120	0.061	0.056	0.079	0.0653333	0.00987702
			S160	0.074	0.079	0.075	0.076	0.00216025
			S200	0.076	0.067	0.091	0.078	0.00989949
			S240	0.077	0.084	0.083	0.0813333	0.00309121
		Explanation：This table is the raw data of citric acid conent determination. We set up three repetitions in each experiment to ensure the reliability of the results, and finally take the average as the final result.
